# Supplementary material for: Intramolecular charge transfer enhanced optical limiting in novel hydrazone derivatives with a D1–D–Ai–π–A structure
Source: Royal Society of Chemistry journal article supplement (doi:10.1039/d4cp00475b), 2024-01-01
Supplement: d4cp00475b1.pdf [file d4cp00475b1.pdf]

**Intramolecular Charge Transfer Enhanced Optical Limiting in  
Novel Hydrazone Derivatives with D<sub>1</sub>-D-A<sub>i</sub>- $\pi$ -A  
Structure(supporting information)\***

Hongjuan Zhu<sup>1</sup>, Danyang Zhang<sup>1</sup>, Xianghao Sun<sup>1</sup>,  
Shifeng Qian<sup>1</sup>, Eryin Feng<sup>1</sup>, Xiaowei Sheng<sup>1\*</sup>

*1. Anhui Province Key Laboratory for Control and  
Applications of Optoelectronic Information Materials,  
Anhui Normal University, Anhui, Wuhu 241000, China*

---

\*Correspondence

Xiaowei Sheng, E-mail: xwsheng@mail.ahnu.edu.cn

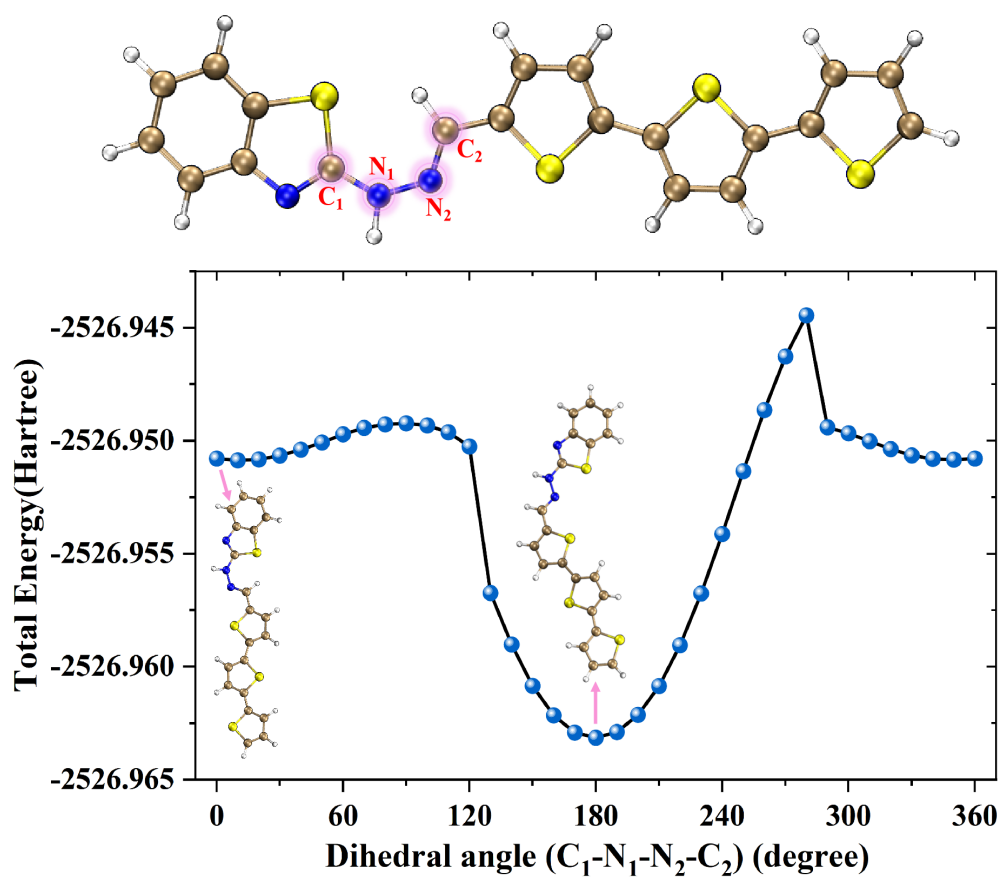

FIG. S1: Potential energy curve of BTH at different dihedral angles.

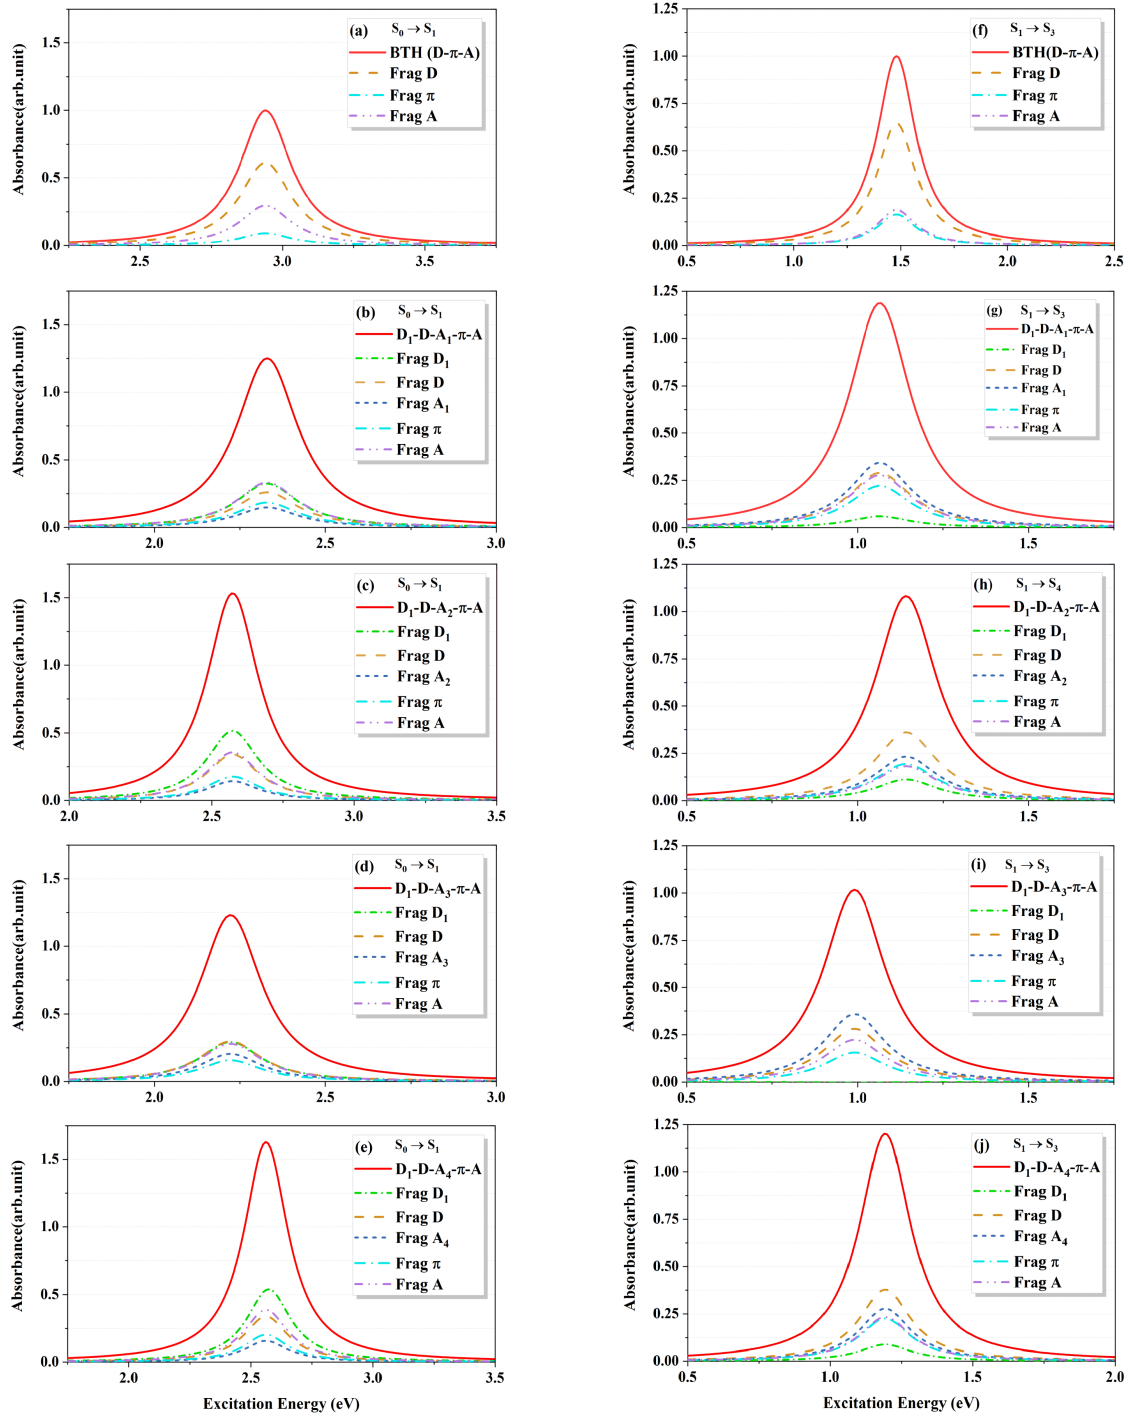

FIG. S2: Contributions of various fragment to the  $S_0 \rightarrow S_1$  and  $S_1 \rightarrow S_n$  transition spectra in BTH and the present designed four hydrazone derivatives.

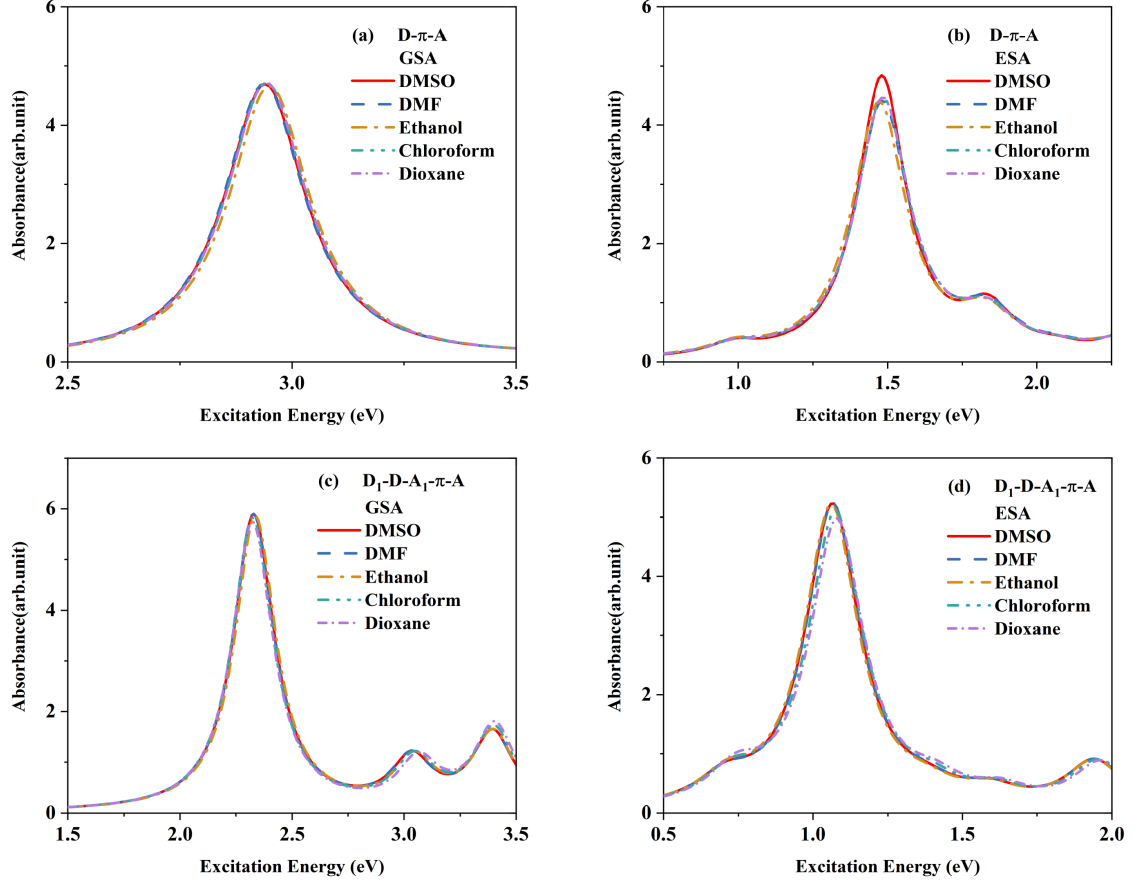

FIG. S3: GSA and ESA spectra of BTH and  $D_1$ -D- $A_1$ - $\pi$ -A in various solvents.

TABLE S1: Distance between centroid of hole and electron ( $D$ ), hole delocalization index (HDI) and electron delocalization index (EDI) for the  $S_0 \rightarrow S_1$  transition of the BTH and  $D_1$ -D- $A_i$ - $\pi$ -A molecules.

|                            | $D(\text{\AA})$ | HDI  | EDI  |
|----------------------------|-----------------|------|------|
| D- $\pi$ -A(BTH)           | 0.14            | 6.01 | 5.77 |
| $D_1$ -D- $A_1$ - $\pi$ -A | 2.13            | 5.01 | 5.36 |
| $D_1$ -D- $A_2$ - $\pi$ -A | 1.72            | 4.91 | 4.58 |
| $D_1$ -D- $A_3$ - $\pi$ -A | 2.63            | 4.78 | 4.90 |
| $D_1$ -D- $A_4$ - $\pi$ -A | 1.50            | 4.83 | 4.72 |
